# Supplementary material for: Facile production of quercetin nanoparticles using 3D printed centrifugal flow reactors
Source: Royal Society of Chemistry journal article supplement (doi:10.1039/d2ra02745c), 2022-01-01
Supplement: d2ra02745c3.pdf [file d2ra02745c3.pdf]

## Supplementary Material for:

# Facile production of quercetin nanoparticles using 3D printed centrifugal flow reactors

Davide De Grandi,<sup>a,b</sup> Alireza Meghdadi,<sup>b,c</sup> Gareth LuTheryn<sup>b</sup> and Dario Carugo<sup>†,b</sup>

<sup>a</sup> Department of Drug Sciences, Faculty of Pharmacy, University of Pavia, Pavia 27100, Italy.

<sup>b</sup> Department of Pharmaceutics, School of Pharmacy, University College London, London WC1N 1AX, United Kingdom

<sup>c</sup> Department of Mechanical Engineering, Faculty of Engineering and Physical Sciences, University of Southampton, Southampton SO17 1BJ, United Kingdom.

† Article correspondence to: Dr Dario Carugo, [d.carugo@ucl.ac.uk](mailto:d.carugo@ucl.ac.uk)

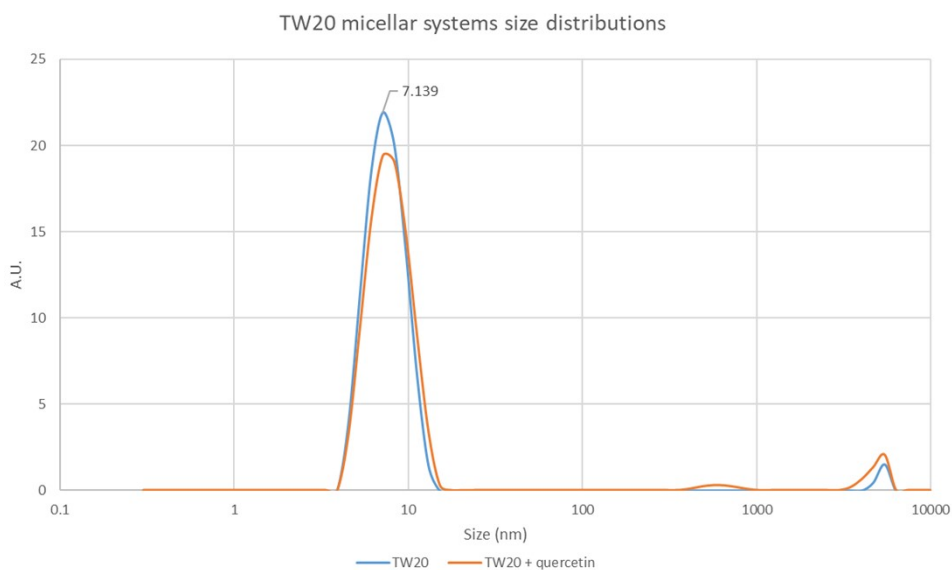

Figure S1 Size distribution of a micellar dispersion of TW20 4% in the absence (blue) and presence (orange) of quercetin. Micelles show a comparable dimension both in the presence or absence of quercetin.

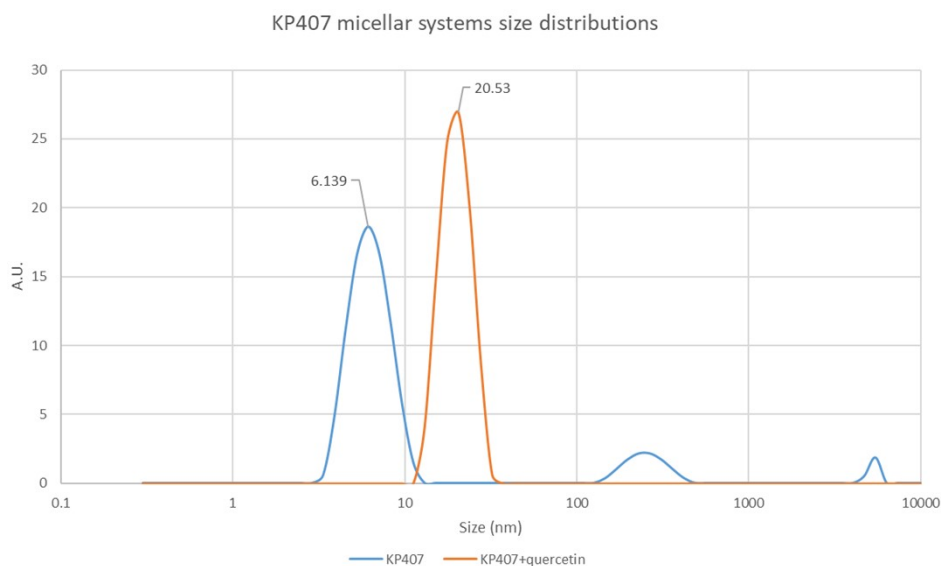

Figure S2 – Size distribution of a micellar dispersion of KP407 4% in the absence (blue) and presence (orange) of quercetin. There is a substantial size difference between the two samples, which may be attributed to the presence of quercetin molecules in the micellar structure.

Table S1 – Data frame of samples manufactured using increasing HPMC concentration (0.5%, 0.75%, 1%).

| Sample             | RCF     | Focal_Var | RIAC     | Size  | PDI      |
|--------------------|---------|-----------|----------|-------|----------|
| 500_H.05_K4.1_SP   | 500RCF  | HPMC_05   | SPIRAL   | 196.7 | 0.09633  |
| 500_H.05_K4.1_SP   | 500RCF  | HPMC_05   | SPIRAL   | 196.1 | 0.069695 |
| 500_H.05_K4.1_SP   | 500RCF  | HPMC_05   | SPIRAL   | 201.2 | 0.025106 |
| 500_H.05_K4.1_ST   | 500RCF  | HPMC_05   | STRAIGHT | 226.8 | 0.086568 |
| 500_H.05_K4.1_ST   | 500RCF  | HPMC_05   | STRAIGHT | 255.6 | 0.141242 |
| 500_H.05_K4.1_ST   | 500RCF  | HPMC_05   | STRAIGHT | 244.6 | 0.052753 |
| 3000_H.05_K4.1_SP  | 3000RCF | HPMC_05   | SPIRAL   | 181.3 | 0.032571 |
| 3000_H.05_K4.1_SP  | 3000RCF | HPMC_05   | SPIRAL   | 200.7 | 0.09402  |
| 3000_H.05_K4.1_SP  | 3000RCF | HPMC_05   | SPIRAL   | 189.8 | 0.085259 |
| 3000_H.05_K4.1_ST  | 3000RCF | HPMC_05   | STRAIGHT | 234.2 | 0.128214 |
| 3000_H.05_K4.1_ST  | 3000RCF | HPMC_05   | STRAIGHT | 245.4 | 0.034166 |
| 3000_H.05_K4.1_ST  | 3000RCF | HPMC_05   | STRAIGHT | 225.9 | 0.060252 |
| 500_H.075_K4.1_SP  | 500RCF  | HPMC_075  | SPIRAL   | 255.8 | 0.055036 |
| 500_H.075_K4.1_SP  | 500RCF  | HPMC_075  | SPIRAL   | 249.5 | 0.097609 |
| 500_H.075_K4.1_SP  | 500RCF  | HPMC_075  | SPIRAL   | 248.3 | 0.055129 |
| 500_H.075_K4.1_ST  | 500RCF  | HPMC_075  | STRAIGHT | 248.8 | 0.047878 |
| 500_H.075_K4.1_ST  | 500RCF  | HPMC_075  | STRAIGHT | 272.2 | 0.131559 |
| 500_H.075_K4.1_ST  | 500RCF  | HPMC_075  | STRAIGHT | 259.9 | 0.094298 |
| 3000_H.075_K4.1_SP | 3000RCF | HPMC_075  | SPIRAL   | 215.9 | 0.049779 |
| 3000_H.075_K4.1_SP | 3000RCF | HPMC_075  | SPIRAL   | 300.1 | 0.133867 |
| 3000_H.075_K4.1_SP | 3000RCF | HPMC_075  | SPIRAL   | 230.3 | 0.11767  |
| 3000_H.075_K4.1_ST | 3000RCF | HPMC_075  | STRAIGHT | 207.3 | 0.042667 |
| 3000_H.075_K4.1_ST | 3000RCF | HPMC_075  | STRAIGHT | 215.9 | 0.058861 |
| 3000_H.075_K4.1_ST | 3000RCF | HPMC_075  | STRAIGHT | 247.3 | 0.100299 |
| 500_H.1_K4.1_SP    | 500RCF  | HPMC_1    | SPIRAL   | 229.7 | 0.020954 |
| 500_H.1_K4.1_SP    | 500RCF  | HPMC_1    | SPIRAL   | 310.7 | 0.03005  |
| 500_H.1_K4.1_SP    | 500RCF  | HPMC_1    | SPIRAL   | 280.2 | 0.036511 |
| 500_H.1_K4.1_ST    | 500RCF  | HPMC_1    | STRAIGHT | 243.5 | 0.036295 |
| 500_H.1_K4.1_ST    | 500RCF  | HPMC_1    | STRAIGHT | 246.9 | 0.108961 |
| 500_H.1_K4.1_ST    | 500RCF  | HPMC_1    | STRAIGHT | 296   | 0.060489 |
| 3000_H.1_K4.1_SP   | 3000RCF | HPMC_1    | SPIRAL   | 209.1 | 0.027128 |
| 3000_H.1_K4.1_SP   | 3000RCF | HPMC_1    | SPIRAL   | 264.2 | 0.016338 |
| 3000_H.1_K4.1_SP   | 3000RCF | HPMC_1    | SPIRAL   | 356.4 | 0.127981 |
| 3000_H.1_K4.1_ST   | 3000RCF | HPMC_1    | STRAIGHT | 267.7 | 0.038696 |
| 3000_H.1_K4.1_ST   | 3000RCF | HPMC_1    | STRAIGHT | 305.3 | 0.110747 |
| 3000_H.1_K4.1_ST   | 3000RCF | HPMC_1    | STRAIGHT | 333.8 | 0.142711 |

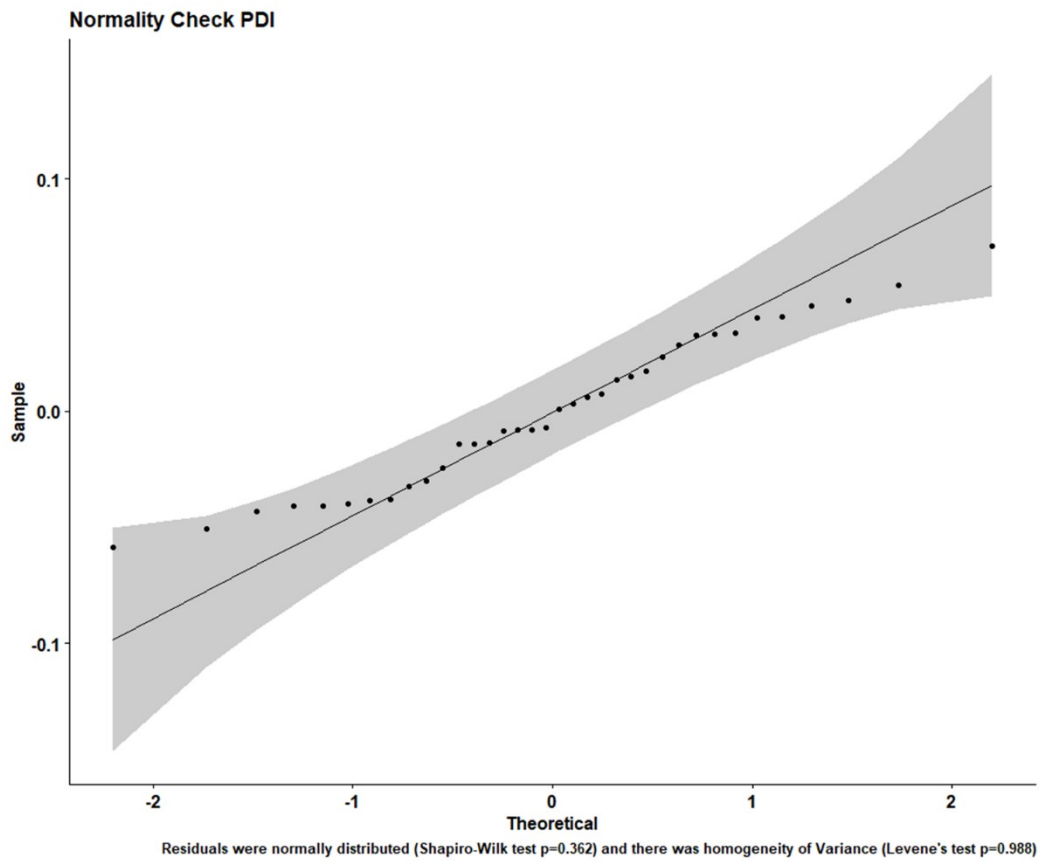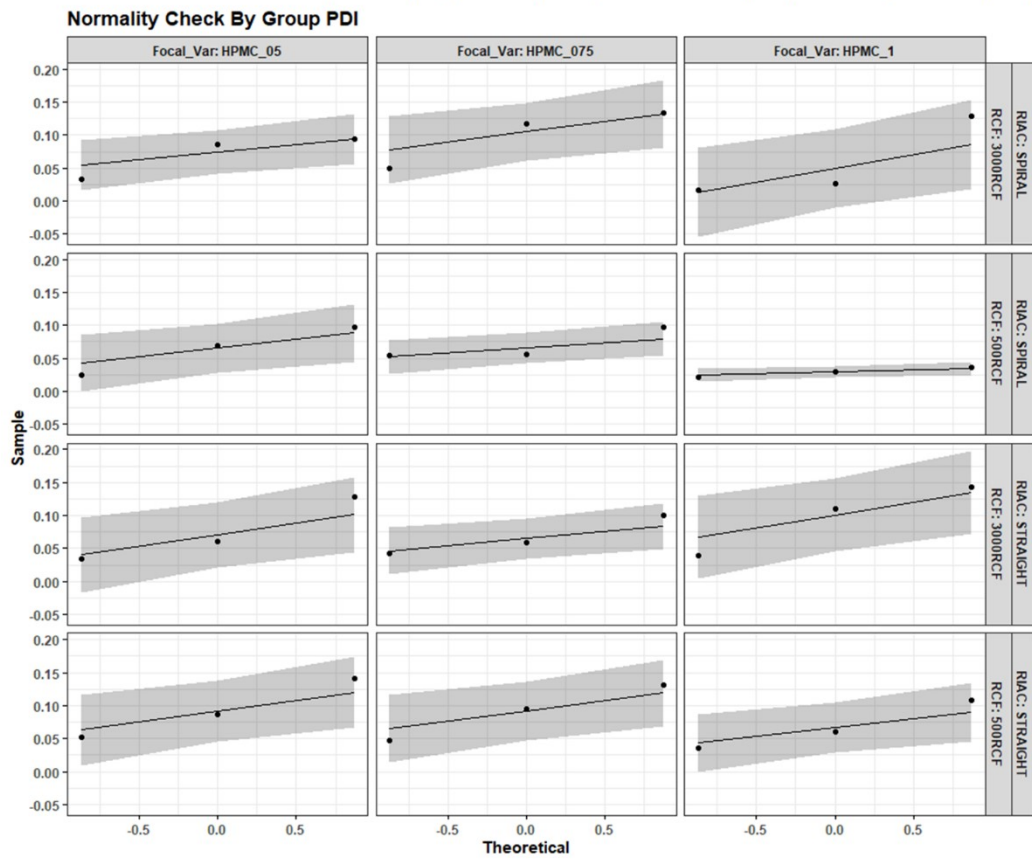

Figure S3 – Evaluation of ANOVA assumptions. The residuals of the linear model computed using the PDI data in Table S1 were normally distributed, and the Homogeneity of Variance assumption is also met. Shapiro-Wilk and Levene's tests were run to prove the validity of the assumptions.

Table S2 – Results of Three-Way ANOVA carried out to evaluate the effect of different independent variables on the PDI.

| Three-Way ANOVA PDI |     |     |       |       |       |       |
|---------------------|-----|-----|-------|-------|-------|-------|
| Effect              | DFn | DFd | F     | p     | p<.05 | ges   |
| RIAC                | 1   | 24  | 1.553 | 0.225 |       | 0.061 |
| RCF                 | 1   | 24  | 0.398 | 0.534 |       | 0.016 |
| Focal_Var           | 2   | 24  | 0.668 | 0.522 |       | 0.053 |
| RIAC:RCF            | 1   | 24  | 0.971 | 0.334 |       | 0.039 |
| RIAC:Focal_Var      | 2   | 24  | 0.926 | 0.41  |       | 0.072 |
| RCF:Focal_Var       | 2   | 24  | 0.571 | 0.573 |       | 0.045 |
| RIAC:RCF:Focal_Var  | 2   | 24  | 0.352 | 0.707 |       | 0.028 |

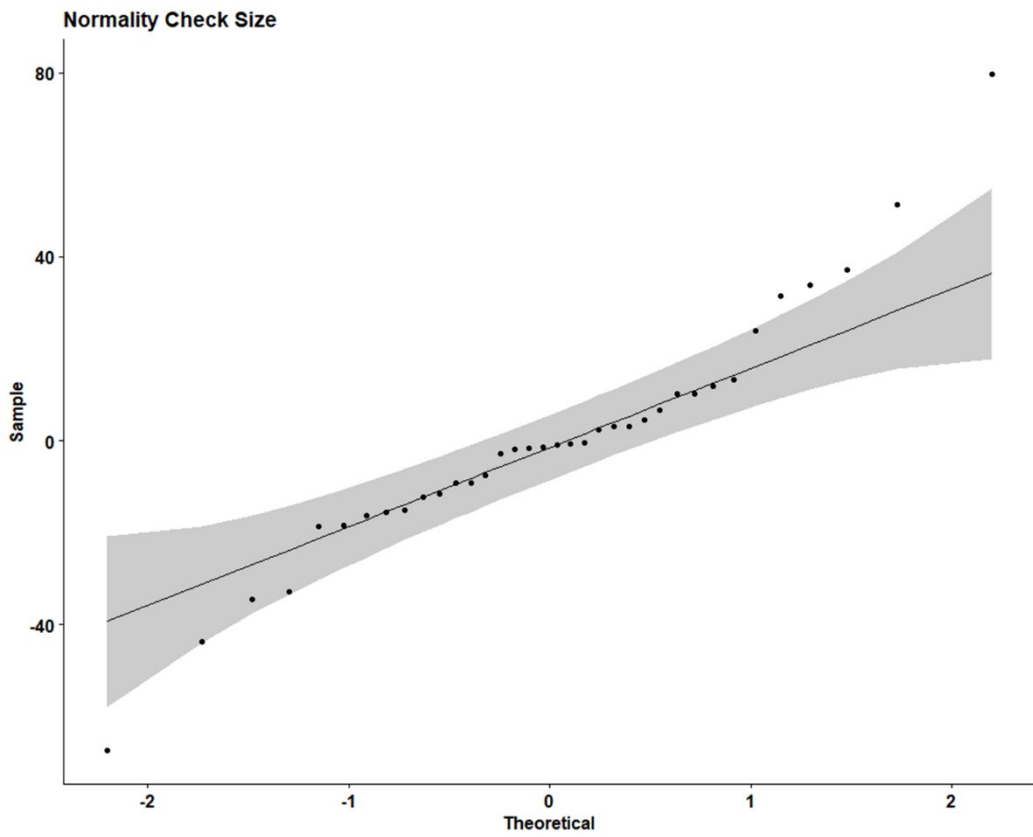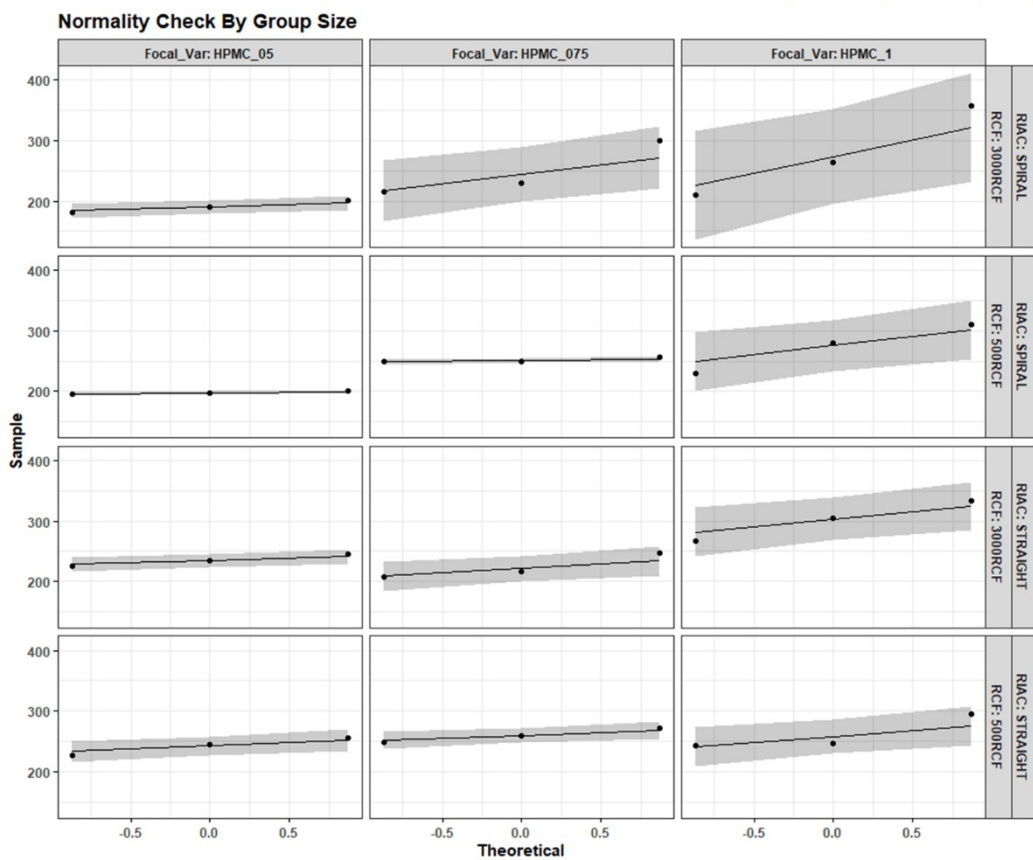

Figure S4 - Evaluation of ANOVA assumptions. The residuals of the linear model computed using the particle size data in Table S1 were normally distributed, and the Homogeneity of Variance assumption is also met. Shapiro-Wilk and Levene's tests were run to prove the validity of the assumptions.

Table S3 - Results of Three-Way ANOVA carried out to evaluate the effect of different independent variables on nanoparticle mean diameter.

| Three-Way ANOVA    |     |     |        |          |       |          |
|--------------------|-----|-----|--------|----------|-------|----------|
| Effect             | DFn | DFd | F      | p        | p<.05 | ges      |
| RIAC               | 1   | 24  | 1.861  | 0.185    |       | 0.072    |
| RCF                | 1   | 24  | 0.028  | 0.869    |       | 0.001    |
| Focal_Var          | 2   | 24  | 11.382 | 3.34E-04 | *     | 0.487    |
| RIAC:RCF           | 1   | 24  | 0.002  | 0.963    |       | 9.01E-05 |
| RIAC:Focal_Var     | 2   | 24  | 2.154  | 0.138    |       | 0.152    |
| RCF:Focal_Var      | 2   | 24  | 1.318  | 0.286    |       | 0.099    |
| RIAC:RCF:Focal_Var | 2   | 24  | 0.942  | 0.404    |       | 0.073    |

Table S4 – Pairwise comparisons (t-test, Bonferroni adjusted). Nanocrystal size of samples grouped in four different ways was compared to identify any statistically significant difference.

| Pairwise comparison_1 (t-test, Bonferroni adjust) Size |           |      |         |          |    |    |         |          |         |               |            |        |   |       |       |  |
|--------------------------------------------------------|-----------|------|---------|----------|----|----|---------|----------|---------|---------------|------------|--------|---|-------|-------|--|
| RCF                                                    | Focal_Var | .y.  | group 1 | group 2  | n1 | n2 | p       | p.signif | p.adj   | p.adj. signif | y.position | groups | x | xm in | xm ax |  |
| 3000RCF                                                | HPMC_05   | Size | SPIRAL  | STRAIGHT | 3  | 3  | 0.00501 | **       | 0.00501 | **            | 264.084    |        | 1 | 0.8   | 1.2   |  |
| 3000RCF                                                | HPMC_075  | Size | SPIRAL  | STRAIGHT | 3  | 3  | 0.428   | ns       | 0.428   | ns            | 318.784    |        | 2 | 1.8   | 2.2   |  |
| 3000RCF                                                | HPMC_1    | Size | SPIRAL  | STRAIGHT | 3  | 3  | 0.614   | ns       | 0.614   | ns            | 375.084    |        | 3 | 2.8   | 3.2   |  |
| 500RCF                                                 | HPMC_05   | Size | SPIRAL  | STRAIGHT | 3  | 3  | 0.00657 | **       | 0.00657 | **            | 274.284    |        | 1 | 0.8   | 1.2   |  |
| 500RCF                                                 | HPMC_075  | Size | SPIRAL  | STRAIGHT | 3  | 3  | 0.272   | ns       | 0.272   | ns            | 290.884    |        | 2 | 1.8   | 2.2   |  |
| 500RCF                                                 | HPMC_1    | Size | SPIRAL  | STRAIGHT | 3  | 3  | 0.715   | ns       | 0.715   | ns            | 329.384    |        | 3 | 2.8   | 3.2   |  |

| Pairwise comparison_2 (t-test, Bonferroni adjust) Size |          |      |         |         |    |    |        |          |        |               |            |        |   |       |       |  |
|--------------------------------------------------------|----------|------|---------|---------|----|----|--------|----------|--------|---------------|------------|--------|---|-------|-------|--|
| Focal_Var                                              | RIAC     | .y.  | group 1 | group 2 | n1 | n2 | p      | p.signif | p.adj  | p.adj. signif | y.position | groups | x | xm in | xm ax |  |
| HPMC_05                                                | SPIRAL   | Size | 3000RCF | 500RCF  | 3  | 3  | 0.274  | ns       | 0.274  | ns            | 219.884    |        | 1 | 0.8   | 1.2   |  |
| HPMC_075                                               | SPIRAL   | Size | 3000RCF | 500RCF  | 3  | 3  | 0.93   | ns       | 0.93   | ns            | 318.784    |        | 2 | 1.8   | 2.2   |  |
| HPMC_1                                                 | SPIRAL   | Size | 3000RCF | 500RCF  | 3  | 3  | 0.954  | ns       | 0.954  | ns            | 375.084    |        | 3 | 2.8   | 3.2   |  |
| HPMC_05                                                | STRAIGHT | Size | 3000RCF | 500RCF  | 3  | 3  | 0.518  | ns       | 0.518  | ns            | 274.284    |        | 1 | 0.8   | 1.2   |  |
| HPMC_075                                               | STRAIGHT | Size | 3000RCF | 500RCF  | 3  | 3  | 0.0572 | ns       | 0.0572 | ns            | 290.884    |        | 2 | 1.8   | 2.2   |  |
| HPMC_1                                                 | STRAIGHT | Size | 3000RCF | 500RCF  | 3  | 3  | 0.192  | ns       | 0.192  | ns            | 352.484    |        | 3 | 2.8   | 3.2   |  |

| Pairwise comparison_3 (t-test, Bonferroni adjust) Size |        |      |         |          |    |    |       |          |       |               |            |        |       |       |
|--------------------------------------------------------|--------|------|---------|----------|----|----|-------|----------|-------|---------------|------------|--------|-------|-------|
| RCF                                                    | RIAC   | .y.  | group 1 | group 2  | n1 | n2 | p     | p.signif | p.adj | p.adj. signif | y.position | groups | xm in | xm ax |
| 3000RCF                                                | SPIRAL | Size | HPMC_05 | HPMC_075 | 3  | 3  | 0.208 | ns       | 0.625 | ns            | 375.084    |        | 1     | 2     |

|         |          |      |              |              |   |   |             |    |            |    |             |  |   |   |
|---------|----------|------|--------------|--------------|---|---|-------------|----|------------|----|-------------|--|---|---|
| 3000RCF | SPIRAL   | Size | HPMC<br>_05  | HPMC<br>_1   | 3 | 3 | 0.08<br>23  | ns | 0.247      | ns | 403.1<br>1  |  | 1 | 3 |
| 3000RCF | SPIRAL   | Size | HPMC<br>_075 | HPMC<br>_1   | 3 | 3 | 0.52<br>6   | ns | 1          | ns | 431.1<br>36 |  | 2 | 3 |
| 500RCF  | SPIRAL   | Size | HPMC<br>_05  | HPMC<br>_075 | 3 | 3 | 0.03<br>38  | *  | 0.101      | ns | 329.3<br>84 |  | 1 | 2 |
| 500RCF  | SPIRAL   | Size | HPMC<br>_05  | HPMC<br>_1   | 3 | 3 | 0.00<br>809 | ** | 0.024<br>3 | *  | 357.4<br>1  |  | 1 | 3 |
| 500RCF  | SPIRAL   | Size | HPMC<br>_075 | HPMC<br>_1   | 3 | 3 | 0.29<br>4   | ns | 0.882      | ns | 385.4<br>36 |  | 2 | 3 |
| 3000RCF | STRAIGHT | Size | HPMC<br>_05  | HPMC<br>_075 | 3 | 3 | 0.56<br>3   | ns | 1          | ns | 352.4<br>84 |  | 1 | 2 |
| 3000RCF | STRAIGHT | Size | HPMC<br>_05  | HPMC<br>_1   | 3 | 3 | 0.01<br>26  | *  | 0.037<br>7 | *  | 380.5<br>1  |  | 1 | 3 |
| 3000RCF | STRAIGHT | Size | HPMC<br>_075 | HPMC<br>_1   | 3 | 3 | 0.00<br>616 | ** | 0.018<br>5 | *  | 408.5<br>36 |  | 2 | 3 |
| 500RCF  | STRAIGHT | Size | HPMC<br>_05  | HPMC<br>_075 | 3 | 3 | 0.31<br>5   | ns | 0.946      | ns | 314.6<br>84 |  | 1 | 2 |
| 500RCF  | STRAIGHT | Size | HPMC<br>_05  | HPMC<br>_1   | 3 | 3 | 0.27<br>3   | ns | 0.819      | ns | 342.7<br>1  |  | 1 | 3 |
| 500RCF  | STRAIGHT | Size | HPMC<br>_075 | HPMC<br>_1   | 3 | 3 | 0.91<br>5   | ns | 1          | ns | 370.7<br>36 |  | 2 | 3 |

Pairwise comparison\_4 (t-test, Bonferroni adjust) Size

| RIAC     | .y.  | group<br>1   | group<br>2   | n1 | n2 | p           | p.sig<br>nif | p.adj   | p.adj.<br>signif | y.posi<br>tion | grou<br>ps | xmi<br>n | xm<br>ax |
|----------|------|--------------|--------------|----|----|-------------|--------------|---------|------------------|----------------|------------|----------|----------|
| SPIRAL   | Size | HPMC<br>_05  | HPMC<br>_075 | 6  | 6  | 0.01<br>57  | *            | 0.0472  | *                | 375.0<br>24    |            | 1        | 2        |
| SPIRAL   | Size | HPMC<br>_05  | HPMC<br>_1   | 6  | 6  | 0.00<br>129 | **           | 0.00386 | **               | 402.9<br>6     |            | 1        | 3        |
| SPIRAL   | Size | HPMC<br>_075 | HPMC<br>_1   | 6  | 6  | 0.23<br>9   | ns           | 0.718   | ns               | 430.8<br>96    |            | 2        | 3        |
| STRAIGHT | Size | HPMC<br>_05  | HPMC<br>_075 | 6  | 6  | 0.83<br>7   | ns           | 1       | ns               | 352.4<br>24    |            | 1        | 2        |
| STRAIGHT | Size | HPMC<br>_05  | HPMC<br>_1   | 6  | 6  | 0.01<br>14  | *            | 0.0342  | *                | 380.3<br>6     |            | 1        | 3        |
| STRAIGHT | Size | HPMC<br>_075 | HPMC<br>_1   | 6  | 6  | 0.01<br>74  | *            | 0.0521  | ns               | 408.2<br>96    |            | 2        | 3        |

Table S5 – Data frame of samples manufactured using different stabilizers (KP188, KP407, TW20).

| Sample             | RCF     | Focal_Var | RIAC     | Size  | PDI      |
|--------------------|---------|-----------|----------|-------|----------|
| 500_H.05_K18.1_SP  | 500RCF  | KP188     | SPIRAL   | 221.4 | 0.030255 |
| 500_H.05_K18.1_SP  | 500RCF  | KP188     | SPIRAL   | 230.2 | 0.109084 |
| 500_H.05_K18.1_SP  | 500RCF  | KP188     | SPIRAL   | 250.1 | 0.083246 |
| 500_H.05_K18.1_ST  | 500RCF  | KP188     | STRAIGHT | 237.1 | 0.068004 |
| 500_H.05_K18.1_ST  | 500RCF  | KP188     | STRAIGHT | 245.4 | 0.094906 |
| 500_H.05_K18.1_ST  | 500RCF  | KP188     | STRAIGHT | 228.7 | 0.109678 |
| 3000_H.05_K18.1_SP | 3000RCF | KP188     | SPIRAL   | 238   | 0.089572 |
| 3000_H.05_K18.1_SP | 3000RCF | KP188     | SPIRAL   | 232.4 | 0.125653 |
| 3000_H.05_K18.1_SP | 3000RCF | KP188     | SPIRAL   | 248.2 | 0.111855 |
| 3000_H.05_K18.1_ST | 3000RCF | KP188     | STRAIGHT | 257.2 | 0.06675  |
| 3000_H.05_K18.1_ST | 3000RCF | KP188     | STRAIGHT | 249.5 | 0.094258 |
| 3000_H.05_K18.1_ST | 3000RCF | KP188     | STRAIGHT | 263.1 | 0.142391 |
| 500_H.05_K4.1_SP   | 500RCF  | KP407     | SPIRAL   | 196.7 | 0.09633  |
| 500_H.05_K4.1_SP   | 500RCF  | KP407     | SPIRAL   | 196.1 | 0.069695 |
| 500_H.05_K4.1_SP   | 500RCF  | KP407     | SPIRAL   | 201.2 | 0.025106 |
| 500_H.05_K4.1_ST   | 500RCF  | KP407     | STRAIGHT | 226.8 | 0.086568 |
| 500_H.05_K4.1_ST   | 500RCF  | KP407     | STRAIGHT | 255.6 | 0.141242 |
| 500_H.05_K4.1_ST   | 500RCF  | KP407     | STRAIGHT | 244.6 | 0.052753 |
| 3000_H.05_K4.1_SP  | 3000RCF | KP407     | SPIRAL   | 181.3 | 0.032571 |
| 3000_H.05_K4.1_SP  | 3000RCF | KP407     | SPIRAL   | 200.7 | 0.09402  |
| 3000_H.05_K4.1_SP  | 3000RCF | KP407     | SPIRAL   | 189.8 | 0.085259 |
| 3000_H.05_K4.1_ST  | 3000RCF | KP407     | STRAIGHT | 234.2 | 0.128214 |
| 3000_H.05_K4.1_ST  | 3000RCF | KP407     | STRAIGHT | 245.4 | 0.034166 |
| 3000_H.05_K4.1_ST  | 3000RCF | KP407     | STRAIGHT | 225.9 | 0.060252 |
| 500_H.05_TW2.1_SP  | 500RCF  | TW20      | SPIRAL   | 220.9 | 0.057175 |
| 500_H.05_TW2.1_SP  | 500RCF  | TW20      | SPIRAL   | 225.3 | 0.073691 |
| 500_H.05_TW2.1_SP  | 500RCF  | TW20      | SPIRAL   | 221.5 | 0.120439 |
| 500_H.05_TW2.1_ST  | 500RCF  | TW20      | STRAIGHT | 216.2 | 0.098663 |
| 500_H.05_TW2.1_ST  | 500RCF  | TW20      | STRAIGHT | 239   | 0.086618 |
| 500_H.05_TW2.1_ST  | 500RCF  | TW20      | STRAIGHT | 228.6 | 0.070622 |
| 3000_H.05_TW2.1_SP | 3000RCF | TW20      | SPIRAL   | 218.8 | 0.06713  |
| 3000_H.05_TW2.1_SP | 3000RCF | TW20      | SPIRAL   | 212.1 | 0.060269 |
| 3000_H.05_TW2.1_SP | 3000RCF | TW20      | SPIRAL   | 206.9 | 0.081428 |
| 3000_H.05_TW2.1_ST | 3000RCF | TW20      | STRAIGHT | 206.4 | 0.102437 |
| 3000_H.05_TW2.1_ST | 3000RCF | TW20      | STRAIGHT | 227.9 | 0.060898 |
| 3000_H.05_TW2.1_ST | 3000RCF | TW20      | STRAIGHT | 202.8 | 0.056746 |



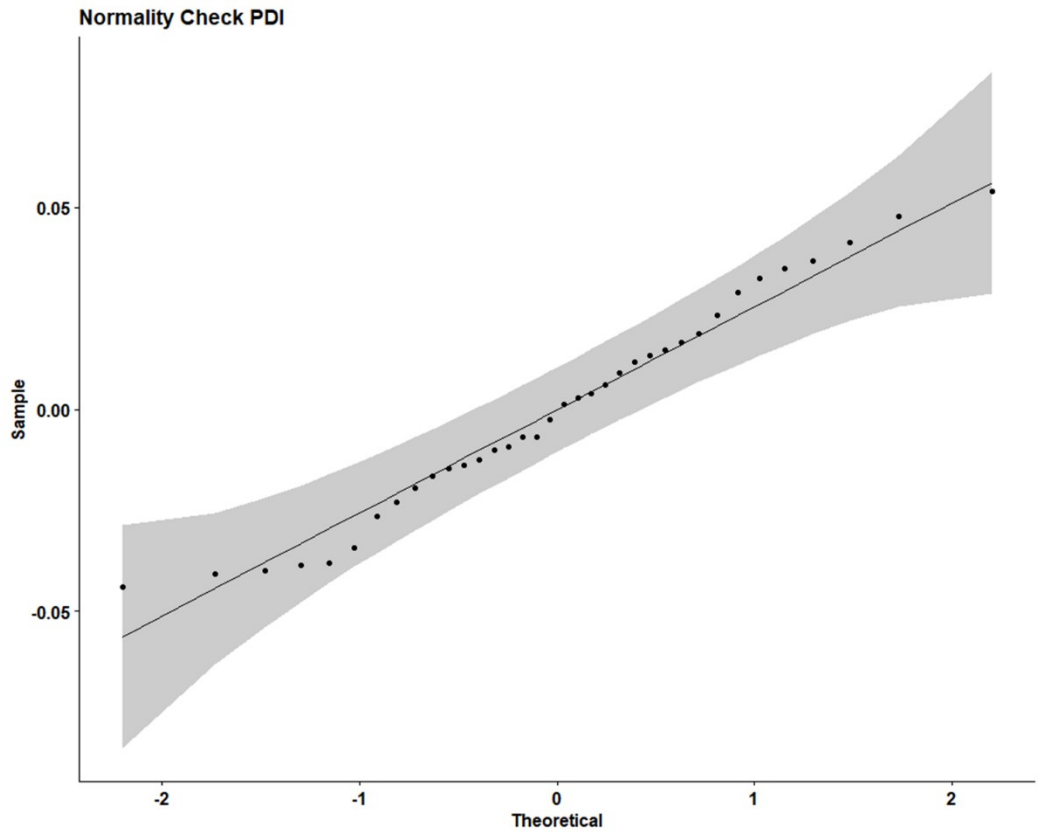

Residuals were normally distributed (Shapiro-Wilk test  $p=0.477$ ) and there was homogeneity of Variance (Levene's test  $p=0.987$ )

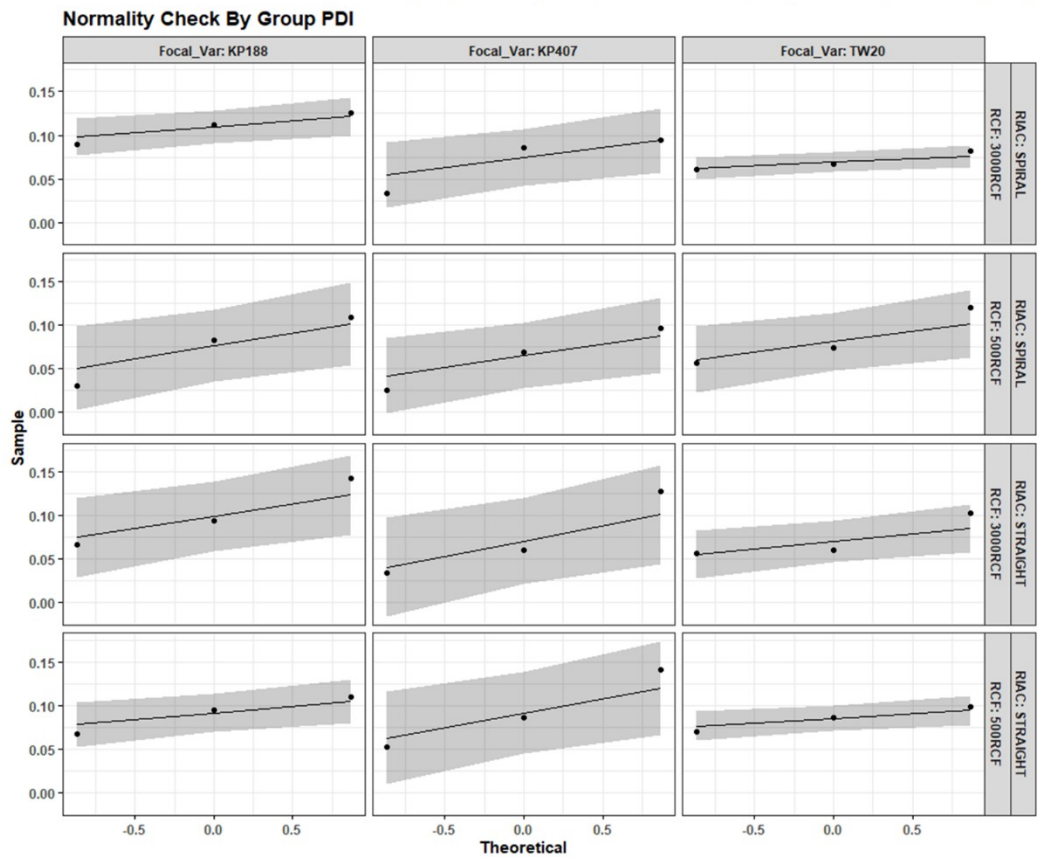

Figure S5 - Evaluation of ANOVA assumptions. The residuals of the linear model computed using the PDI data in Table S2 were normally distributed, and the Homogeneity of Variance assumption is also met. Shapiro-Wilk and Levene's tests were run to prove the validity of the assumptions.

Table S6 - Results of Three-Way ANOVA carried out to evaluate the effect of different independent variables on the PDI.

| Three-Way ANOVA<br>PDI |     |     |       |   |       |          |
|------------------------|-----|-----|-------|---|-------|----------|
| Effect                 | DFn | DFd | F     | p | p<.05 | ges      |
| RIAC                   | 1   | 24  | 0.535 | 0 |       | 0.022    |
| RCF                    | 1   | 24  | 0.01  | 1 |       | 4.30E-04 |
| Focal_Var              | 2   | 24  | 1.121 | 0 |       | 0.085    |
| RIAC:RCF               | 1   | 24  | 0.56  | 0 |       | 0.023    |
| RIAC:Focal_Var         | 2   | 24  | 0.167 | 1 |       | 0.014    |
| RCF:Focal_Var          | 2   | 24  | 1.016 | 0 |       | 0.078    |
| RIAC:RCF:Focal_Var     | 2   | 24  | 0.181 | 1 |       | 0.015    |

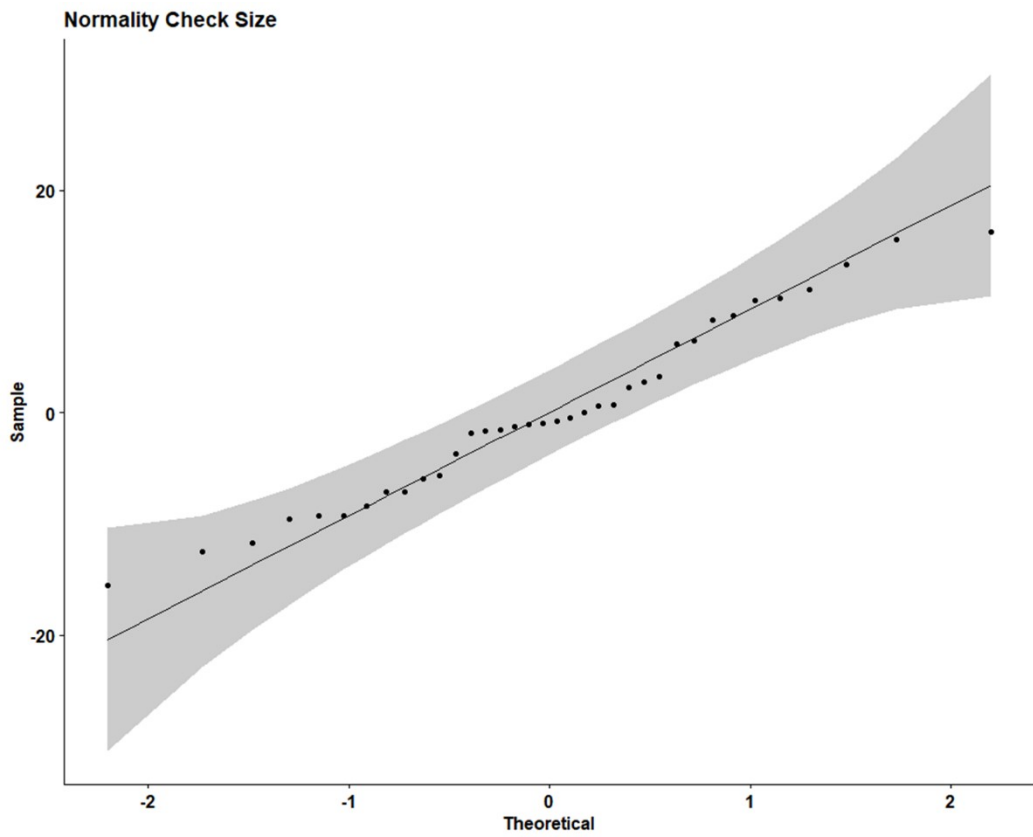

Residuals were normally distributed (Shapiro-Wilk test  $p=0.530$ ) and there was homogeneity of Variance (Levene's test  $p=0.876$ )

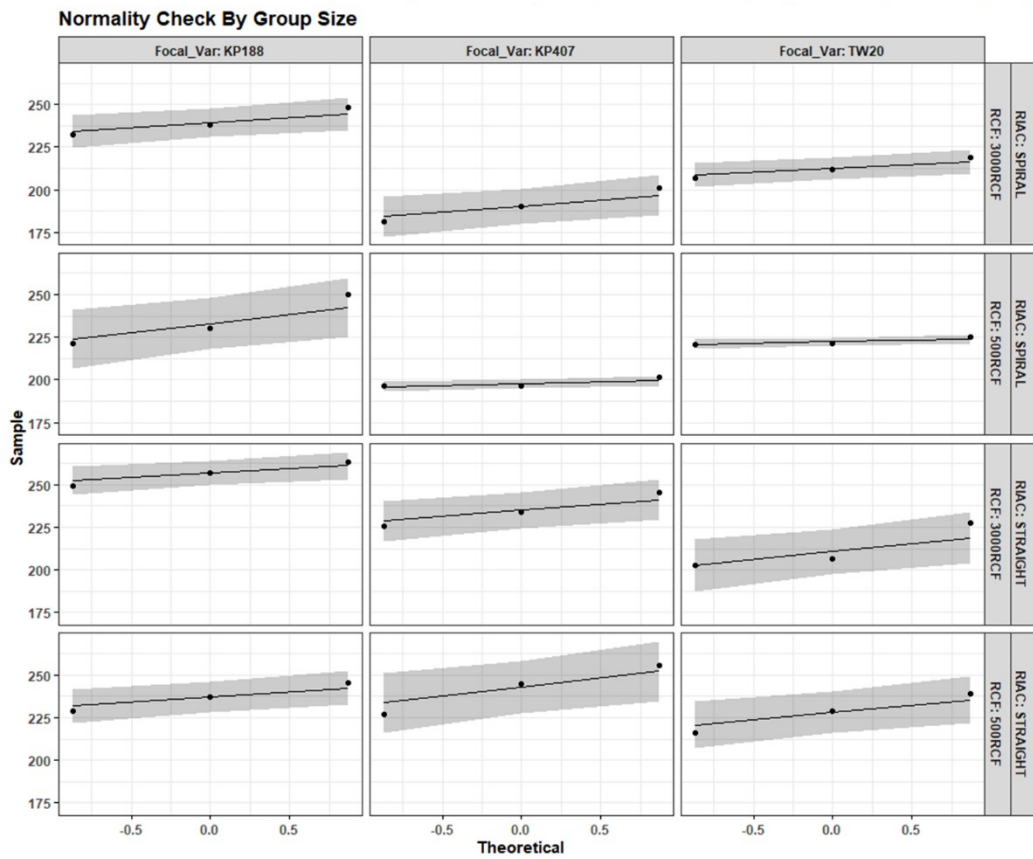

Figure S6 Evaluation of ANOVA assumptions. The residuals of the linear model computed using the particle size data in Table S2 were normally distributed, and the Homogeneity of Variance assumption is also met. Shapiro-Wilk and Levene's tests were run to prove the validity of the assumptions.

Table S7 - Results of Three-Way ANOVA carried out to evaluate the effect of different independent variables on nanoparticle mean diameter.

| Three-Way ANOVA Size |     |     |        |          |       |          |
|----------------------|-----|-----|--------|----------|-------|----------|
| Effect               | DFn | DFd | F      | p        | p<.05 | ges      |
| RIAC                 | 1   | 24  | 33.719 | 5.49E-06 | *     | 0.584    |
| RCF                  | 1   | 24  | 0.576  | 0.455    |       | 0.023    |
| Focal_Var            | 2   | 24  | 24.127 | 1.80E-06 | *     | 0.668    |
| RIAC:RCF             | 1   | 24  | 0.188  | 0.668    |       | 8.00E-03 |
| RIAC:Focal_Var       | 2   | 24  | 15.443 | 4.89E-05 | *     | 0.563    |
| RCF:Focal_Var        | 2   | 24  | 5.513  | 0.011    | *     | 0.315    |

Table S8 – Pairwise comparisons (t-test, Bonferroni adjusted). Nanocrystal size of samples grouped in four different ways was compared to identify any statistically significant difference.

| Pairwise comparison_1 (t-test, Bonferroni adjust) Size |           |      |        |          |    |    |         |              |         |                  |                |            |   |          |          |
|--------------------------------------------------------|-----------|------|--------|----------|----|----|---------|--------------|---------|------------------|----------------|------------|---|----------|----------|
| RCF                                                    | Focal_Var | .y.  | group1 | group2   | n1 | n2 | p       | p.sig<br>nif | p.adj   | p.adj.<br>signif | y.posi<br>tion | gro<br>ups | x | xm<br>in | xm<br>ax |
| 3000RCF                                                | KP188     | Size | SPIRAL | STRAIGHT | 3  | 3  | 0.0483  | *            | 0.0483  | *                | 270.588        |            | 1 | 0.8      | 1.2      |
| 3000RCF                                                | KP407     | Size | SPIRAL | STRAIGHT | 3  | 3  | 0.00501 | **           | 0.00501 | **               | 252.888        |            | 2 | 1.8      | 2.2      |
| 3000RCF                                                | TW20      | Size | SPIRAL | STRAIGHT | 3  | 3  | 0.98    | ns           | 0.98    | ns               | 235.388        |            | 3 | 2.8      | 3.2      |
| 500RCF                                                 | KP188     | Size | SPIRAL | STRAIGHT | 3  | 3  | 0.762   | ns           | 0.762   | ns               | 257.588        |            | 1 | 0.8      | 1.2      |
| 500RCF                                                 | KP407     | Size | SPIRAL | STRAIGHT | 3  | 3  | 0.00657 | **           | 0.00657 | **               | 263.088        |            | 2 | 1.8      | 2.2      |
| 500RCF                                                 | TW20      | Size | SPIRAL | STRAIGHT | 3  | 3  | 0.47    | ns           | 0.47    | ns               | 246.488        |            | 3 | 2.8      | 3.2      |

| Pairwise comparison_2 (t-test, Bonferroni adjust) Size |          |      |         |        |    |    |        |              |        |                  |                |            |   |          |          |
|--------------------------------------------------------|----------|------|---------|--------|----|----|--------|--------------|--------|------------------|----------------|------------|---|----------|----------|
| Focal_Var                                              | RIAC     | .y.  | group1  | group2 | n1 | n2 | p      | p.sig<br>nif | p.adj  | p.adj.<br>signif | y.posi<br>tion | gro<br>ups | x | xm<br>in | xm<br>ax |
| KP188                                                  | SPIRAL   | Size | 3000RCF | 500RCF | 3  | 3  | 0.591  | ns           | 0.591  | ns               | 257.588        |            | 1 | 0.8      | 1.2      |
| KP407                                                  | SPIRAL   | Size | 3000RCF | 500RCF | 3  | 3  | 0.274  | ns           | 0.274  | ns               | 208.688        |            | 2 | 1.8      | 2.2      |
| TW20                                                   | SPIRAL   | Size | 3000RCF | 500RCF | 3  | 3  | 0.0548 | ns           | 0.0548 | ns               | 232.788        |            | 3 | 2.8      | 3.2      |
| KP188                                                  | STRAIGHT | Size | 3000RCF | 500RCF | 3  | 3  | 0.0349 | *            | 0.0349 | *                | 270.588        |            | 1 | 0.8      | 1.2      |
| KP407                                                  | STRAIGHT | Size | 3000RCF | 500RCF | 3  | 3  | 0.518  | ns           | 0.518  | ns               | 263.088        |            | 2 | 1.8      | 2.2      |
| TW20                                                   | STRAIGHT | Size | 3000RCF | 500RCF | 3  | 3  | 0.203  | ns           | 0.203  | ns               | 246.488        |            | 3 | 2.8      | 3.2      |

| Pairwise comparison_3 (t-test, Bonferroni adjust) Size |        |      |        |        |    |    |      |              |        |                  |                |            |          |          |  |
|--------------------------------------------------------|--------|------|--------|--------|----|----|------|--------------|--------|------------------|----------------|------------|----------|----------|--|
| RCF                                                    | RIAC   | .y.  | group1 | group2 | n1 | n2 | p    | p.sig<br>nif | p.adj  | p.adj.<br>signif | y.posi<br>tion | gro<br>ups | xm<br>in | xm<br>ax |  |
| 3000RCF                                                | SPIRAL | Size | KP188  | KP407  | 3  | 3  | 3.02 | ***          | 9.07E- | ***              | 255.6          |            | 1        | 2        |  |

|         |          |      |       |       |   |   |         |    |         |    |         |  |   |   |
|---------|----------|------|-------|-------|---|---|---------|----|---------|----|---------|--|---|---|
|         | L        |      | 8     | 7     |   |   | E-04    |    | 04      |    | 88      |  |   |   |
| 3000RCF | SPIRAL   | Size | KP188 | TW20  | 3 | 3 | 0.00637 | ** | 0.0191  | *  | 266.92  |  | 1 | 3 |
| 3000RCF | SPIRAL   | Size | KP407 | TW20  | 3 | 3 | 0.0155  | *  | 0.0464  | *  | 278.152 |  | 2 | 3 |
| 500RCF  | SPIRAL   | Size | KP188 | KP407 | 3 | 3 | 0.00239 | ** | 0.00717 | ** | 257.588 |  | 1 | 2 |
| 500RCF  | SPIRAL   | Size | KP188 | TW20  | 3 | 3 | 0.164   | ns | 0.491   | ns | 268.82  |  | 1 | 3 |
| 500RCF  | SPIRAL   | Size | KP407 | TW20  | 3 | 3 | 0.0138  | *  | 0.0415  | *  | 280.052 |  | 2 | 3 |
| 3000RCF | STRAIGHT | Size | KP188 | KP407 | 3 | 3 | 0.0455  | *  | 0.137   | ns | 270.588 |  | 1 | 2 |
| 3000RCF | STRAIGHT | Size | KP188 | TW20  | 3 | 3 | 0.00203 | ** | 0.00608 | ** | 281.82  |  | 1 | 3 |
| 3000RCF | STRAIGHT | Size | KP407 | TW20  | 3 | 3 | 0.0367  | *  | 0.11    | ns | 293.052 |  | 2 | 3 |
| 500RCF  | STRAIGHT | Size | KP188 | KP407 | 3 | 3 | 0.602   | ns | 1       | ns | 263.088 |  | 1 | 2 |
| 500RCF  | STRAIGHT | Size | KP188 | TW20  | 3 | 3 | 0.376   | ns | 1       | ns | 274.32  |  | 1 | 3 |
| 500RCF  | STRAIGHT | Size | KP407 | TW20  | 3 | 3 | 0.183   | ns | 0.548   | ns | 285.552 |  | 2 | 3 |

| Pairwise comparison_4 (t-test, Bonferroni adjust) Size |      |        |        |    |    |          |              |          |                  |                |            |          |          |
|--------------------------------------------------------|------|--------|--------|----|----|----------|--------------|----------|------------------|----------------|------------|----------|----------|
| RIAC                                                   | .y.  | group1 | group2 | n1 | n2 | p        | p.sig<br>nif | p.adj    | p.adj.<br>signif | y.posi<br>tion | group<br>s | xmi<br>n | xm<br>ax |
| SPIRAL                                                 | Size | KP188  | KP407  | 6  | 6  | 4.19E-07 | ****         | 1.26E-06 | ****             | 257.528        |            | 1        | 2        |
| SPIRAL                                                 | Size | KP188  | TW20   | 6  | 6  | 0.00166  | **           | 0.00498  | **               | 268.67         |            | 1        | 3        |
| SPIRAL                                                 | Size | KP407  | TW20   | 6  | 6  | 3.12E-04 | ***          | 9.37E-04 | ***              | 279.812        |            | 2        | 3        |
| STRAIGHT                                               | Size | KP188  | KP407  | 6  | 6  | 0.294    | ns           | 0.883    | ns               | 270.528        |            | 1        | 2        |
| STRAIGHT                                               | Size | KP188  | TW20   | 6  | 6  | 0.00269  | **           | 0.00807  | **               | 281.67         |            | 1        | 3        |
| STRAIGHT                                               | Size | KP407  | TW20   | 6  | 6  | 0.0244   | *            | 0.0733   | ns               | 292.812        |            | 2        | 3        |
